# Supplementary material for: Characteristics and management of systemic sclerosis-related osteomyelitis: a retrospective cohort study
Source: Springer Nature journal article supplement (doi:10.1007/s00296-025-05815-5), 2025-03-12
Supplement: MOESM2 [file 296_2025_5815_MOESM2_ESM.pdf]

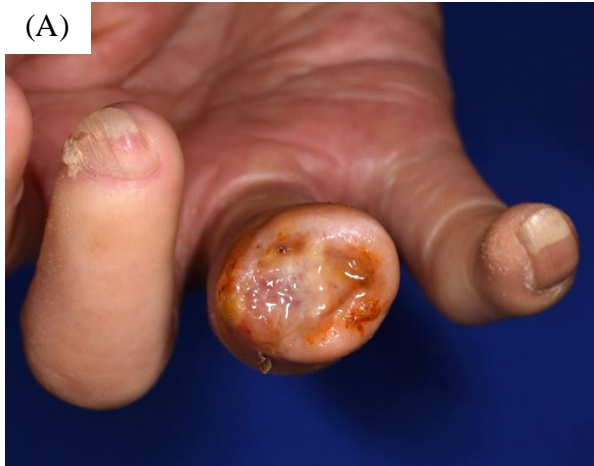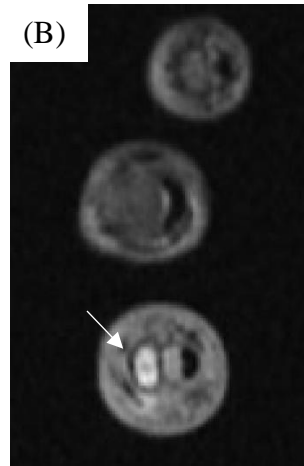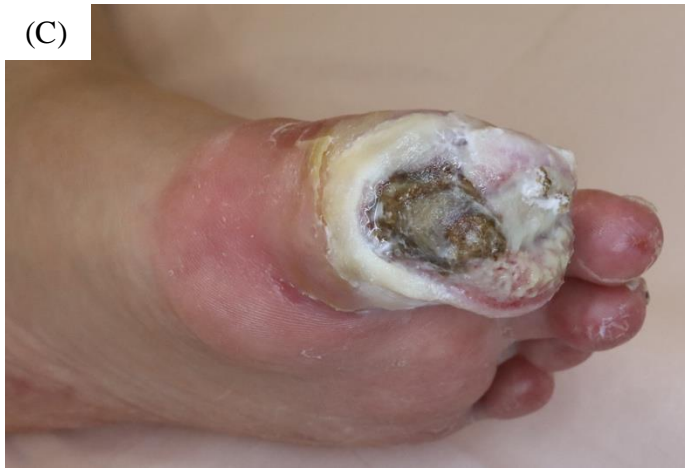

**Online Resource 2. Representing clinical manifestations and magnetic resonance imaging findings of systemic sclerosis-related osteomyelitis.**

A representative skin ulcer accompanied by osteomyelitis in the 4th finger (A) which showed high signal intensity in the middle phalanx on the fat-suppressed T2 sequence of magnetic resonance imaging (B, white arrow). A representative skin ulcer accompanied by osteomyelitis in the toe (C).
